# Supplementary material for: Se/Ru nanoparticles as inhibitors of metal-induced Aβ aggregation in Alzheimer's disease
Source: Royal Society of Chemistry journal article supplement (doi:10.1039/c3tb21586e), 2014-01-01
Supplement: c3tb21586e1.pdf [file c3tb21586e1.pdf]

## **Electronic Supplementary Information (ESI)**

### **Se/Ru nanoparticles as an inhibitor of metal-induced A $\beta$ aggregation in Alzheimer's disease**

Licong Yang<sup>1</sup>, Qingchang Chen<sup>1</sup>, Ying Liu, Jingnan Zhang, Dongdong Sun, Yanhui Zhou and Jie Liu\*

Department of Chemistry, Jinan University, Guangzhou 510632, China.  
Tel.: +86 20 85220223; fax: +86 20 85220223; E-mail: tliuliu@jnu.edu.cn

<sup>1</sup>: Both authors contribute equally to this work.

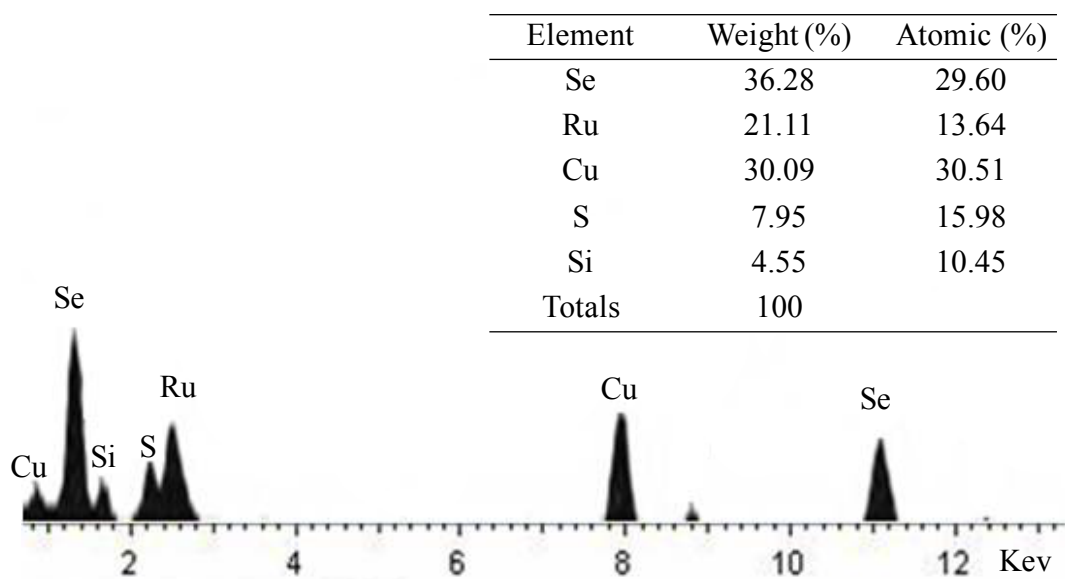

Figure S1. EDX analysis of Se/RuNPs.

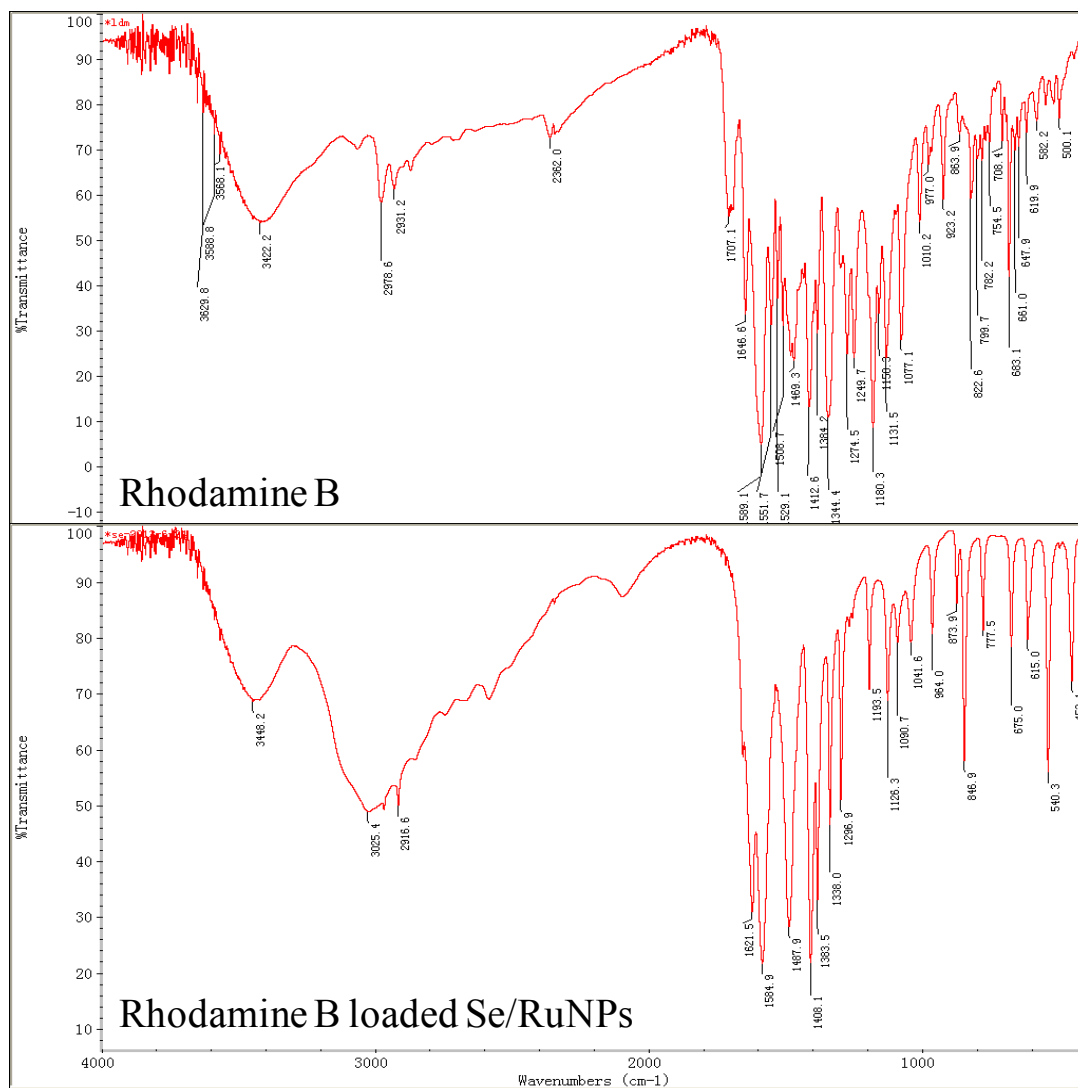

Figure S2. FT-IR spectra of Rhodamine B and Rhodamine B loaded nanoparticles. Nanoparticles were centrifuged at 13000 g for 30 min and the sediment was dried in room temperature.

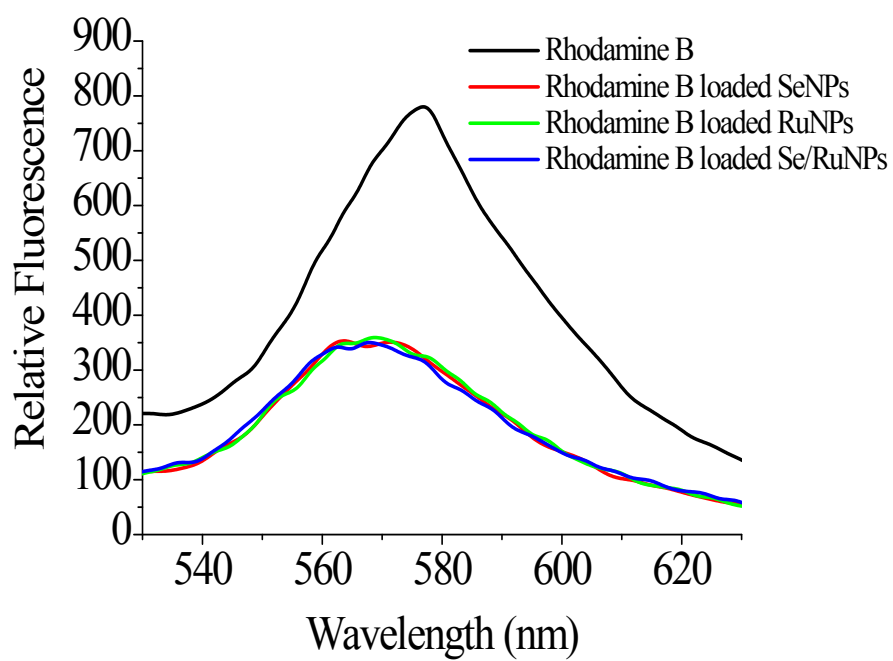

Figure S3. The emission spectrum of Rhodamine B loaded nanoparticles.

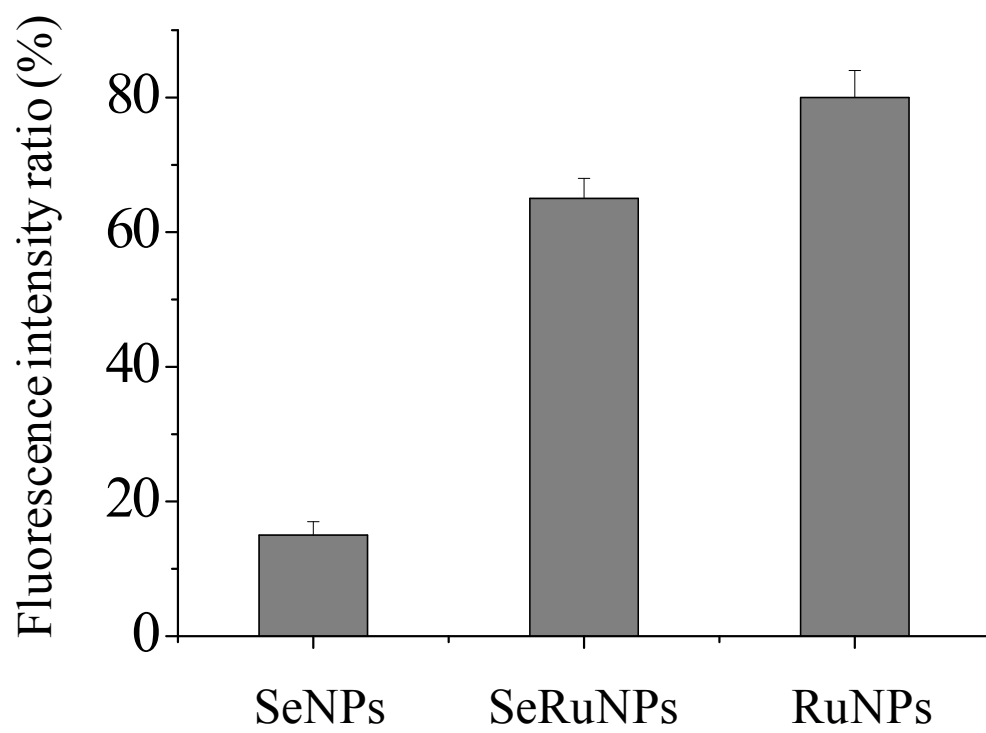

Figure S4. The fluorescence intensity ratio of nanoparticles on  $A\beta_{40}$  fibers.

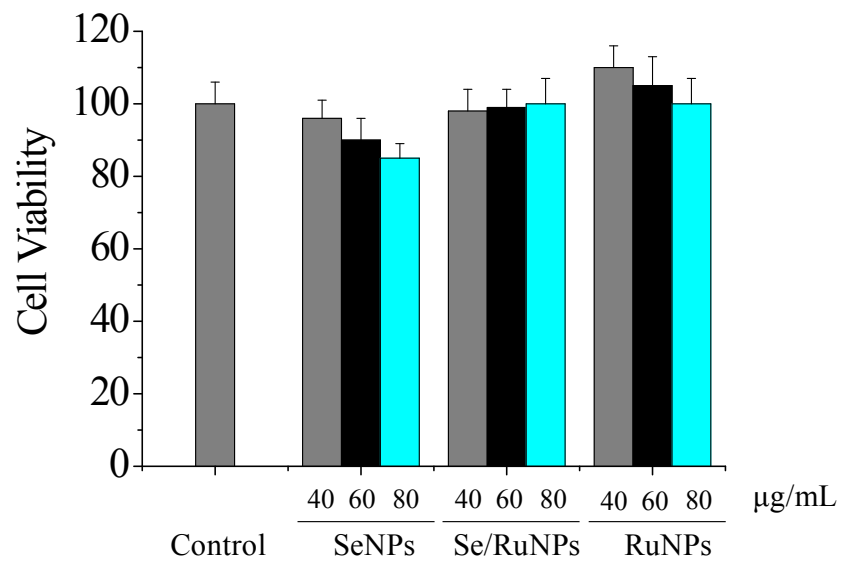

Figure S5. The neurotoxicity of nanoparticles.

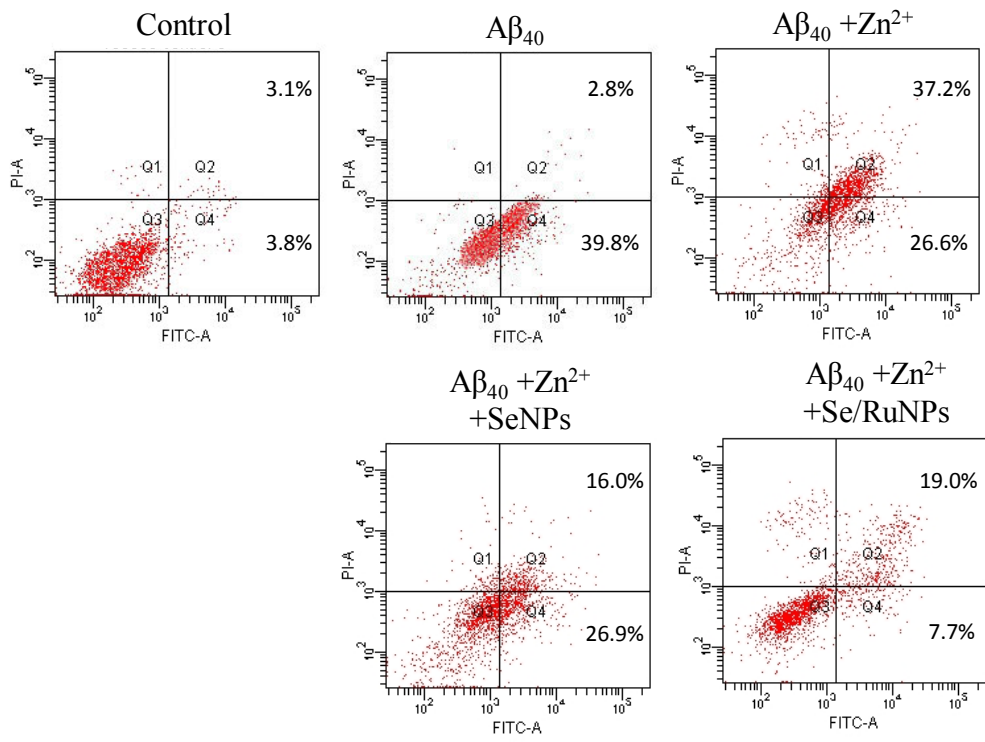

Figure S6. Se/RuNPs prevent the cell death induced by A $\beta_{40}$  in PC12 cells. Apoptotic cell death induced by A $\beta_{40}$  was determined by flow cytometry.
